# Supplementary material for: Novel insights into a major DNA oxidative lesion: its effects on Z-DNA stabilization
Source: Royal Society of Chemistry journal article supplement (doi:10.1039/c5ob01340b), 2015-01-01
Supplement: c5ob01340b1.pdf [file c5ob01340b1.pdf]

## Supporting Information

### Novel Insights into a major DNA oxidative lesion: its effects on Z-DNA stabilization

Jiaqi Wang<sup>†</sup>, Shaoru Wang<sup>†</sup>, Cheng Zhong<sup>†</sup>, Tian Tian<sup>†,\*</sup>, Xiang Zhou<sup>†,\*</sup>

<sup>†</sup> College of Chemistry and Molecular Sciences, Key Laboratory of Biomedical Polymers of Ministry of Education, Wuhan University, Wuhan, Hubei, 430072, P. R. of China.,

**General information:** All the oligonucleotides, including 6mer-3G, 6mer-1oxoG, 6mer-2oxoG, 6mer-3oxoG, 12mer-G, 12mer-1oxoG, 12mer-2oxoG, P0, P1, P2, P3, Template A, Template C, Template G and Template T, dNTPs, dATP, dCTP, dGTP and dTTP were purchased from Takara Co. (Dalian, China). Klenow Fragment(exo-) was purchased from New England Biolabs, Inc. Poly(dI-dC) was purchased from Sigma Inc. 8-Oxo-2'-deoxyguanosine-5'-Triphosphate (8-oxodGTP) and 2'-deoxycytidine-5'-Triphosphate (dCTP) were purchased from Trilink Biotechnologies Inc. The HhaI restriction enzyme and Klenow Fragment were purchased from Thermo Scientific Inc. CD experiments were performed on a Jasco-810 spectropolarimeter (Jasco, Easton, MD, USA).

**Preparation of PolyC-oxoG** The preparation of the modified polymer was conducted in a solution (1 mL) containing 50 mM Tris-HCl (pH 8.0 at 25°C), 1 mM DTT, 5 mM MgCl<sub>2</sub>, 0.4 mM 8-oxo-2'-deoxyguanosine-5'-triphosphate and dCTP, 50 µg of poly(dI-dC), and 40 units of E. coli Klenow Fragment. After 20 hours incubation at 37°C, the reaction was quenched by EDTA at a final concentration of 10 mM. Low molecular weight species were removed by passage through a mini quick spin oligo column, and the polymers were precipitated with ethanol and redissolved in 0.8 ml buffer containing 33 mM Tris-acetate (pH 7.9 at 37°C), 10 mM Mg-acetate, 66 mM K-acetate, and 0.1 mg/mL BSA. The starting poly(dI-dC) was digested overnight by Hha I (final concentration at 60 units/ml) incubation at 37°C. EDTA at a final concentration of 10 mM was added to stop the digestion and the low molecular weight materials were removed by another passage through a mini quick spin oligo column. Protein was removed by digestion with proteinase K and the desired polymers were extracted with phenol and chloroform. **The PolyC-oxoG product was analysed with the NanoDrop® ND-2000 spectrophotometer and the ratio of OD<sub>260</sub>/OD<sub>280</sub> was 1.76, suggesting DNA of high quality.**

**Circular Dichroic Studies** CD experiments utilizing a Jasco-810 spectropolarimeter (Jasco, Easton, MD, USA) were measured at room temperature using a quartz cell with a 1 cm path length, CD spectra were collected from 200 to 350 nm at scanning speed of 200 nm/min. The bandwidth was 5 nm, and the response time was 2 s. All CD spectra were baseline-corrected for signal contributions due to the buffer and were the average of at least two runs.

**CD Melting Studies** For Z-DNA study, a solution of different oligomer (10  $\mu$ M) was prepared in buffer (5 mM Na cacodylate buffer, pH 7.0 at 10  $^{\circ}$ C) containing different concentrations of NaCl. The mixture was first heated to 95  $^{\circ}$ C for 5 min, then slowly cooled to room temperature, and incubated at 4  $^{\circ}$ C for at least 16 h. The CD absorbance were recorded on a Jasco-810 spectropolarimeter equipped with a Jasco Pelter temperature controller and a 1 nm bandwidth. Melting curves were obtained by monitoring absorbance at the indicated nm, while the temperature was ramped from 4 to 90  $^{\circ}$ C at about 0.5-1.5  $^{\circ}$ C/min. Melting profiles were analyzed by fitting them to a concerted two-state model.

**Synthesis of zinc(II) porphyrin 1** Zinc(II) derivative (**1**) of H<sub>2</sub>TMpyP4 was prepared and purified according to an previous protocol (*Biochemistry* **1983**, 22, 2406-14).

**Table S1** Sequences of oligomers used in the studies

| Oligomer    | Sequence(from 5' to 3')                   |
|-------------|-------------------------------------------|
| 6mer-3G     | 5'- CG CG CG -3'                          |
| 6mer-1oxoG  | 5'- C(8-oxodG) CG CG -3'                  |
| 6mer-2oxoG  | 5'- C(8-oxodG) C(8-oxodG) CG -3'          |
| 6mer-3oxoG  | 5'- C(8-oxodG) C(8-oxodG) C(8-oxodG) -3'  |
| 12mer-G     | 5'- CG CG CG CG CG CG -3'                 |
| 12mer-1oxoG | 5'- CG C(8-oxodG) CG CG CG CG -3'         |
| 12mer-2oxoG | 5'- CG C(8-oxodG) CG CG C(8-oxodG) CG -3' |

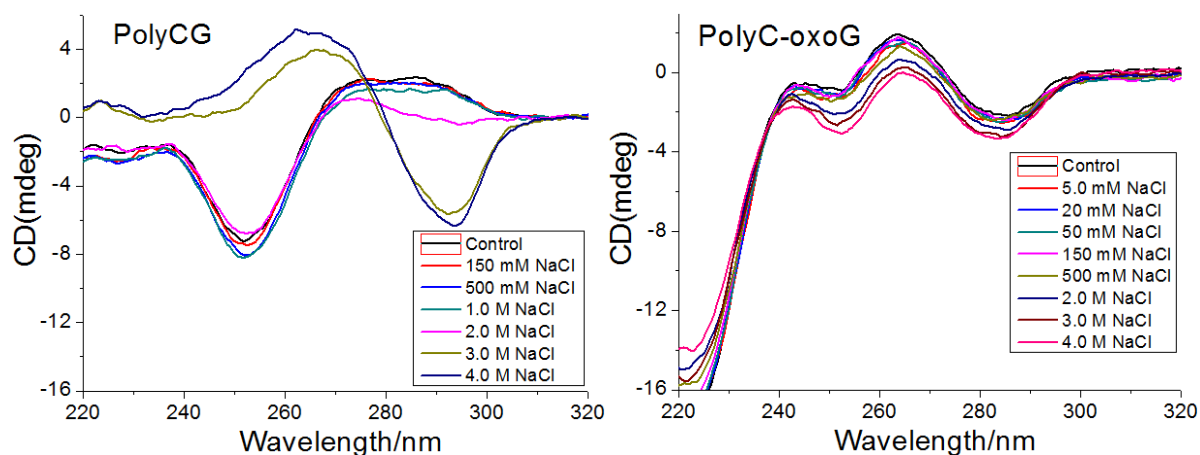

**FIGURE S1.** Circular dichroic (CD) spectra of polyCG and polyC-oxoG in 5 mM Na cacodylate buffer (pH 7.0 at 10 °C), at varied concentrations of NaCl ranging from 0 mM (control) to 4.0 M (each DNA concentration at 80  $\mu$ g/mL).

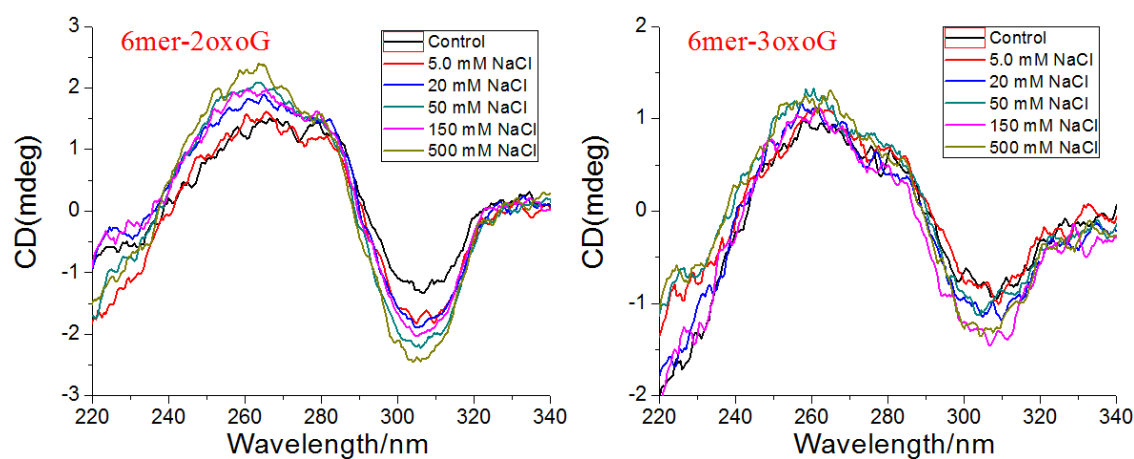

**FIGURE S2.** Circular dichroic (CD) spectra of 6mer-2oxoG and 6mer-3oxoG in 5 mM Na cacodylate buffer (pH 7.0 at 10 °C), at varied concentrations of NaCl ranging from 0 mM (control) to 4.0 M (each oligomer at 10  $\mu$ M strand concentration). A concentration dependent manner could be observed in their circular dichroic spectra.

a)

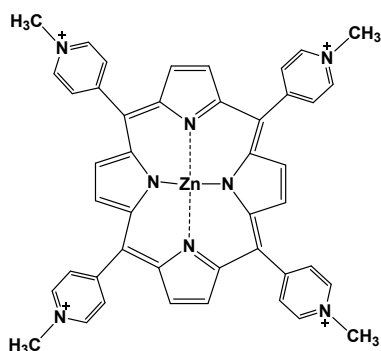

b)

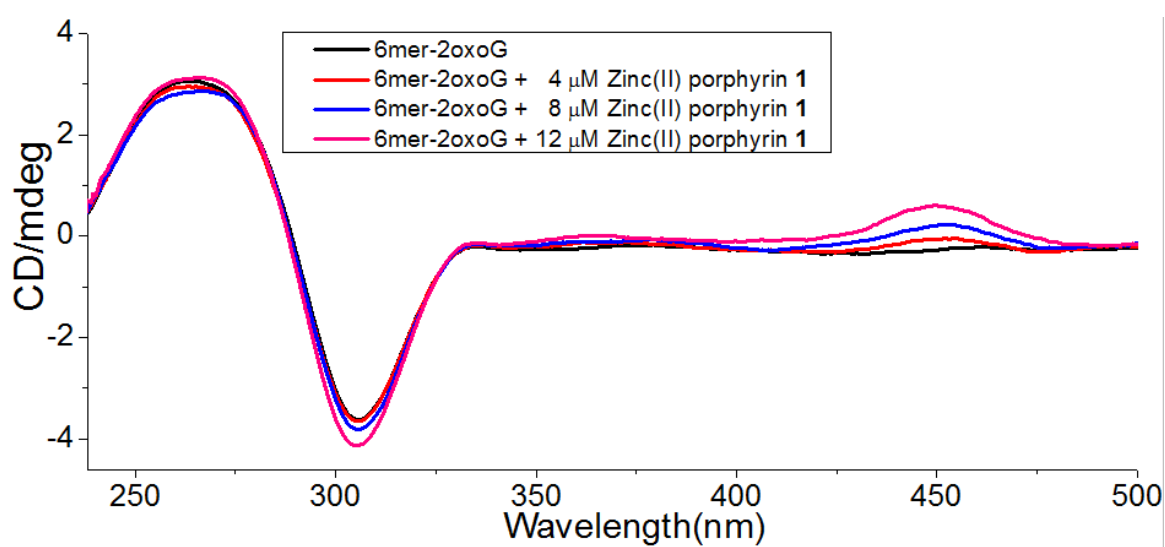

**FIGURE S3. a)** Chemical structure of Zinc(II) porphyrin **1**;

**b)** CD spectra of 6mer-2oxoG (8.0  $\mu\text{M}$ ) in the presence of different amounts of zinc(II) porphyrin (from 4.0  $\mu\text{M}$  to 12  $\mu\text{M}$ ).

This experiment was performed in Na cacodylate buffer (5 mM, pH 7.0) supplemented with 150 mM NaCl. A dose-dependent ICD signal was observed at around 450 nm, indicating a left-handed conformation of 6mer-2oxoG (*Angew Chem Int Ed Engl* **2005**, *44*, 4006-9).

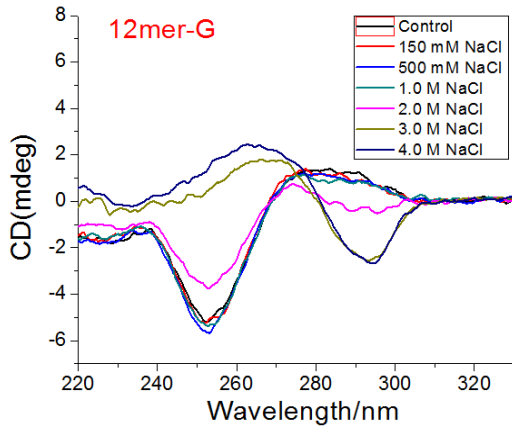

**FIGURE S4.** Circular dichroic (CD) spectra of 12mer-G in 5 mM Na cacodylate buffer (pH 7.0 at 10 °C), at varied concentrations of NaCl ranging from 0 mM (control) to 4.0 M (each oligomer at 10  $\mu$ M strand concentration). A concentration dependent manner could be observed in their circular dichroic spectra.

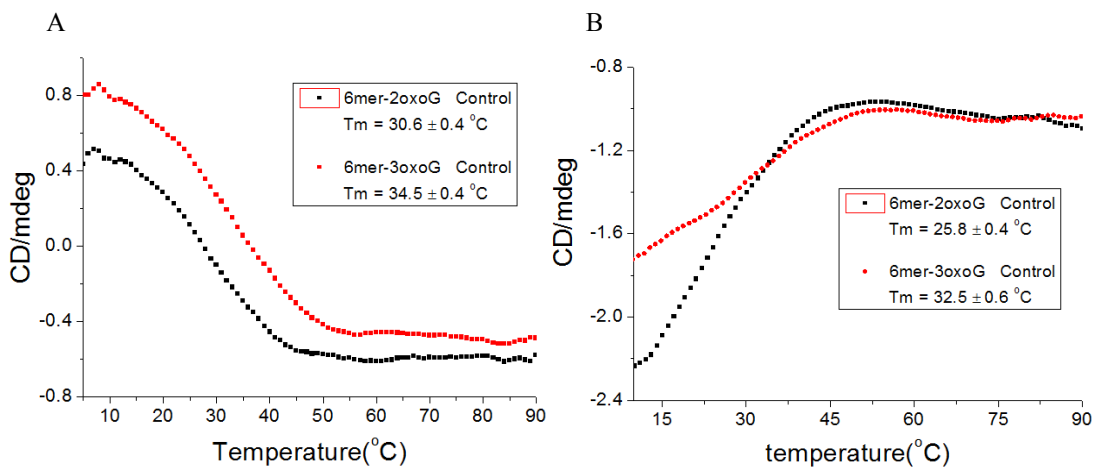

**FIGURE S5.** Normalized CD melting curves of 6mer-2oxoG or 6mer-3oxoG recorded in a quartz cuvette of 0.1 cm path length, at a scan rate of 0.5 °C/min. The experiments were performed in a buffer solution containing 5 mM Na cacodylate (pH 7.0 at 10 °C), 10  $\mu$ M oligomer. 6mer-3oxoG was found to have a larger  $T_m$  than the one of 6mer-2oxoG, which indicated a more stable Z-DNA structure of 6mer-3oxoG. A: CD absorbance at 260 nm was recorded. B: CD absorbance at 305 nm was recorded.

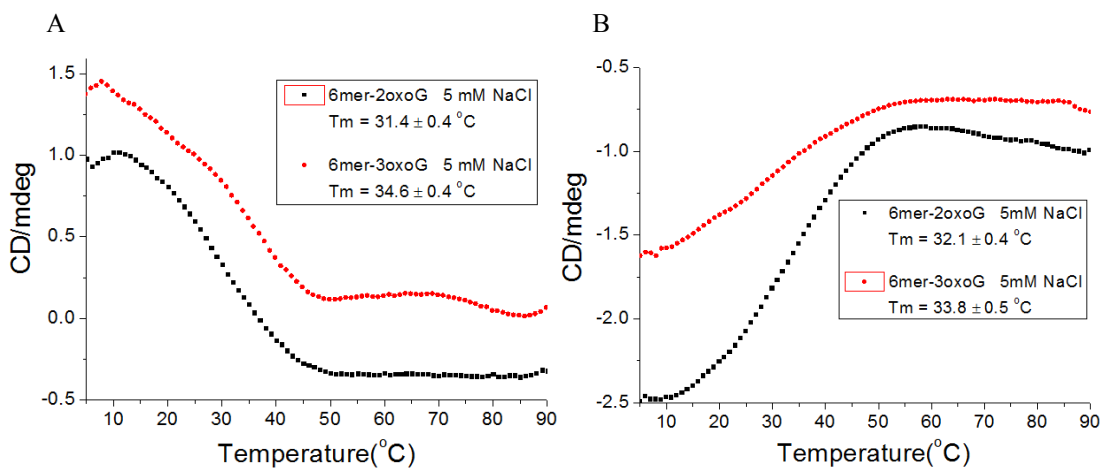

**FIGURE S6.** Normalized CD melting curves of 6mer-2oxoG or 6mer-3oxoG recorded in a quartz cuvette of 0.1 cm path length, at a scan rate of 0.5 °C/min. The experiments were performed in a buffer solution containing 5 mM Na cacodylate (pH 7.0 at 10 °C), 5 mM NaCl, 10  $\mu$ M oligomer. 6mer-3oxoG was found to have a larger  $T_m$  than the one of 6mer-2oxoG, which indicated a more stable Z-DNA structure of 6mer-3oxoG. A: CD absorbance at 260 nm was recorded. B: CD absorbance at 305 nm was recorded.

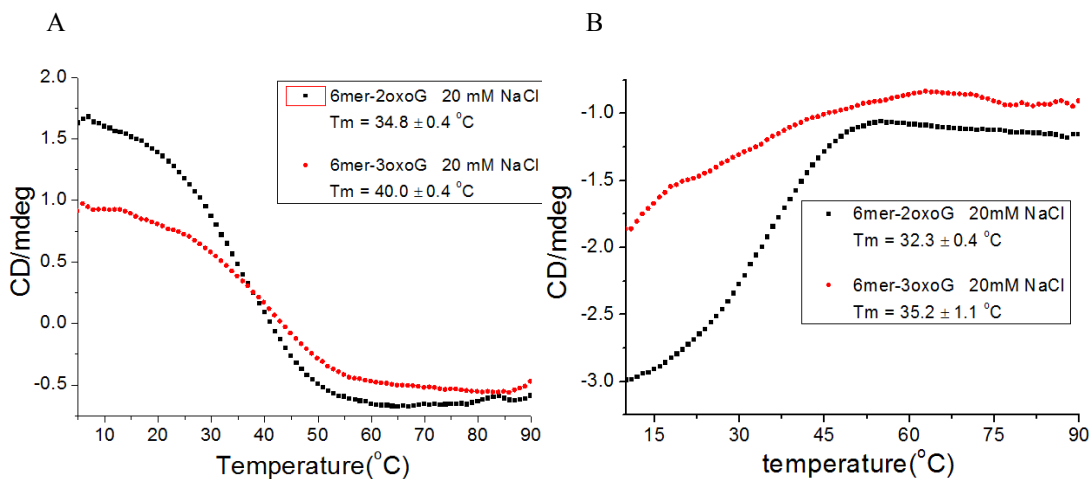

**FIGURE S7.** Normalized CD melting curves of 6mer-2oxoG or 6mer-3oxoG recorded in a quartz cuvette of 0.1 cm path length, at a scan rate of 0.5 °C/min. The experiments were performed in a buffer solution containing 5 mM Na cacodylate (pH 7.0 at 10 °C), 20 mM NaCl, 10  $\mu$ M oligomer. 6mer-3oxoG was found to have a larger  $T_m$  than the one of 6mer-2oxoG, which indicated a more stable Z-DNA structure of 6mer-3oxoG. A: CD absorbance at 260 nm was recorded. B: CD absorbance at 305 nm was recorded.

**DFT Calculation:** The two conformations of guanosine residue were obtained from standard B-DNA (anti, and C<sub>2'</sub>-endo) and Z-DNA (syn, and C<sub>3'</sub>-endo). The phosphate group is removed. And the 5'-OH is capped with methyl group to avoid unnecessary hydrogen bond formation (between 5'-OH and 8-O of 8-oxo-guanine). The guanine groups of up prepared two structures were modified manually to generate their 8-oxo-guanine counterpart. The geometries of all above four structures were optimized at wb97xd/6-311+g(2d,p) level, using Gaussian 09 program. The energies were taken from SCF energy directly.

**Model building:** Since Amber is one of the most popular tools for intrinsic DNA dynamics, it was used in our assay. Eight structural models of 6 base paired d(CGCGCG)<sub>2</sub> repeats were built using the canonical B- and non-canonical Z-DNA settings. Corresponding Guanine was manually modified to 8-oxoGuanine, and the resulting 6mer-3G, 6mer-1oxoG, 6mer-2oxoG, or 6mer-3oxoG was made respectively. Then, the model structures (four Z- and four B-DNA) were prepared for the following simulation study.

**Charge fitting of 8-oxoGuanine residue:** Fitting the charge of non-standard nucleic acids 8-oxoguanine based on multiple orientation, multiple conformation charge derivation automatically carried out using the R.E.D. Tools [F.-Y. Dupradeau, C. Cézard, R. Lelong, E. Stanislawiak, J. Pecher, J. C. Delepine and P. Cieplak, R.E.D.D.B.: A database for RESP and ESP atomic charges, and force field libraries, Nucl. Acids Res. (Database issue), 2008, 36, D360-D367]. Dimethylphosphate (gauche+, gauche+ conformation) and the four stable conformations of 8-oxoguanine (C2'-endo and C3'-endo combined with syn-2' and anti-2' conformations) were obtained by DFT calculations at B3LYP/6-31g(d) level using Gaussian09 program. [Gaussian 09, Revision A.02, M. J. Frisch, G. W. Trucks, H. B. Schlegel, G. E. Scuseria, M. A. Robb, J. R. Cheeseman, G. Scalmani, V. Barone, B. Mennucci, G. A. Petersson, H. Nakatsuji, M. Caricato, X. Li, H. P. Hratchian, A. F. Izmaylov, J. Bloino, G. Zheng, J. L. Sonnenberg, M. Hada, M. Ehara, K. Toyota, R. Fukuda, J. Hasegawa, M. Ishida, T. Nakajima, Y. Honda, O. Kitao, H. Nakai, T. Vreven, J. A. Montgomery, Jr., J. E. Peralta, F. Ogliaro, M. Bearpark, J. J. Heyd, E. Brothers, K. N. Kudin, V. N. Staroverov, R. Kobayashi, J. Normand, K. Raghavachari, A. Rendell, J. C. Burant, S. S. Iyengar, J. Tomasi, M. Cossi, N. Rega, J. M. Millam, M. Klene, J. E. Knox, J. B. Cross, V. Bakken, C. Adamo, J. Jaramillo, R. Gomperts, R. E. Stratmann, O. Yazyev, A. J. Austin, R. Cammi, C. Pomelli, J. W. Ochterski, R. L. Martin, K. Morokuma, V. G. Zakrzewski, G. A. Voth, P. Salvador, J. J. Dannenberg, S. Dapprich, A. D. Daniels, O. Farkas, J. B. Foresman, J. V. Ortiz, J. Cioslowski, and D. J. Fox, Gaussian, Inc., Wallingford CT, 2009]. An inter-molecular charge constraint between the methyl groups of dimethylphosphate and the



HO5' and HO3' hydroxyl groups of the nucleoside used during the fitting step. Additional intramolecular charge constraints were used when building 3' and 5' nucleoside. RESP charge derivation procedure with the Connolly surface algorithm and HF/6-31G\* in MEP computation were used. Stretch, bend, and torsion force constants for 8-oxoguanine residue were assigned by analogy with the standard parm10.dat and gaff.dat Amber force field. The charges and RRMS (which represent the quantity of the fitting) of the 8-oxoguanine - central, 3', and 5' residue - are reported in Table S5, Table S6 and Table S7, respectively. The Stretch, bend and torsion force parameters are listed in Table S8.

**MD Simulations:** The AMBER 12 simulation suite [D.A. Case, T.A. Darden, T.E. Cheatham, III, C.L. Simmerling, J. Wang, R.E. Duke, R. Luo, R.C. Walker, W. Zhang, K.M. Merz, B. Roberts, S. Hayik, A. Roitberg, G. Seabra, J. Swails, A.W. Goetz, I. Kolossvary, K.F. Wong, F. Paesani, J. Vanicek, R.M. Wolf, J. Liu, X. Wu, S.R. Brozell, T. Steinbrecher, H. Gohlke, Q. Cai, X. Ye, J. Wang, M.-J. Hsieh, G. Cui, D.R. Roe, D.H. Mathews, M.G. Seetin, R. Salomon-Ferrer, C. Sagui, V. Babin, T. Luchko, S. Gusarov, A. Kovalenko, and P.A. Kollman (2012), AMBER 12, University of California, San Francisco] was used to carry out MD simulations in the study. The AMBER ff12SB force field was employed to set up the force field and to simulate molecular interactions. TIP3P model was used to perform the simulation of water molecules. 11 Sodium counterions were added for each 6-mer oligonucleotide. Then the models were solvated in a truncated octahedral box of TIP3P water with a distance of 8  to the edge using leap. For the simulations, a time step of 2 femtoseconds was used, and all bonds involving hydrogens were fixed with SHAKE algorithm. The systems were energy minimized and then heated to 300 K in 20 picoseconds (ps) at constant volume with 100 kcal/mol/<sup>2</sup> harmonic restraints on all solute atoms. The harmonic restraints were then reduced to 50, 10, 5 kcal/mol/<sup>2</sup> in 20 ps intervals, followed by 200 ps of unrestrained equilibration at constant pressure and temperature. Then a 20 ns-long production runs were performed for each 6-mer system starting with different initial velocities.

**MM/PBSA analysis:** The MM/PBSA analysis was carried out to calculate the conformational free energies and the python scripts readily within the AMBER 12 simulation suite was used. Snapshots for the MM/PBSA analysis [Miller, Bill R.; McGee, T. Dwight; Swails, Jason M.; Homeyer, Nadine; Gohlke, Holger; Roitberg, Adrian E. MMPBSA.py: An Efficient Program for End-State Free Energy Calculations. *J. Chem. Theory Comput.*, 2012, 8(9), 3314–3321] were extracted from all eight 20 ns

simulations in 40 ps intervals, yielding 500 snapshots per independent trajectory. The ionic strength (istring of &pb namelist variables) were set to 0, 0.005, 0.020, 0.050, 1.000 and 2.000 M for each trajectory. The results were averaged over the 500 snapshots for each system. The sum of total free energy was given in Table S2 - Table S3, and all the detailed free energy results were given in Table S9 – Table S32.

Since no binding energy need to be calculated in this system, there is no typical thermodynamic cycle to calculate  $\Delta G$ . The thermodynamic cycle can be simply drawn as follows:

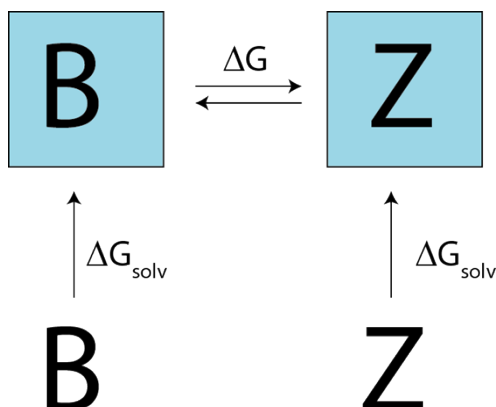

the free energy of solvated B and Z DNA is calculated and compared directly using mmPBSA

**Table S2.** Free energies of B and Z DNA and their difference with ion strength.of 0 mM, 5mM and 20 mM NaCl (Kcal/mol)

|            | 0 mM NaCl |          |       | 5 mM NaCl |          |       | 20 mM NaCl |          |       |
|------------|-----------|----------|-------|-----------|----------|-------|------------|----------|-------|
|            | B-DNA     | Z-DNA    | delta | B-DNA     | Z-DNA    | delta | B-DNA      | Z-DNA    | delta |
| 6mer-3G    | -2690.25  | -2680.50 | 9.75  | -2690.01  | -2680.90 | 9.11  | -2689.79   | -2681.17 | 8.63  |
| 6mer-1oxoG | -2872.09  | -2868.87 | 3.22  | -2871.89  | -2868.96 | 2.93  | -2871.63   | -2869.41 | 2.23  |
| 6mer-2oxoG | -3055.51  | -3054.49 | 1.02  | -3055.43  | -3054.74 | 0.68  | -3055.09   | -3055.18 | -0.09 |
| 6mer-3oxoG | -3196.52  | -3203.45 | -6.93 | -3196.46  | -3203.54 | -7.09 | -3196.11   | -3203.92 | -7.81 |

**Table S3.** Free energies of B and Z DNA and their difference with ion strength.of 50 mM, 1M and 2M NaCl (Kcal/mol)

|            | 50 mM NaCl |          |       | 1 M NaCl |          |       | 2 M NaCl |          |       |
|------------|------------|----------|-------|----------|----------|-------|----------|----------|-------|
|            | B-DNA      | Z-DNA    | delta | B-DNA    | Z-DNA    | delta | B-DNA    | Z-DNA    | delta |
| 6mer-3G    | -2690.34   | -2681.20 | 9.14  | -2690.47 | -2681.84 | 8.63  | -2690.16 | -2682.22 | 7.94  |
| 6mer-1oxoG | -2872.12   | -2869.89 | 2.23  | -2872.37 | -2870.53 | 1.85  | -2872.10 | -2870.92 | 1.17  |
| 6mer-2oxoG | -3055.03   | -3055.34 | -0.31 | -3055.55 | -3055.90 | -0.35 | -3055.40 | -3056.12 | -0.72 |
| 6mer-3oxoG | -3195.86   | -3204.4  | -8.54 | -3196.63 | -3205.04 | -8.42 | -3196.41 | -3205.15 | -8.75 |

**Table S4.** Energies difference between B and Z DNA and for all 4 DNA, the ion strength is 0 mM NaCl

|            | $\Delta_{BZ}$ - 6mer-3G | $\Delta_{BZ}$ - 6mer-1oxoG | $\Delta_{BZ}$ - 6mer-2oxoG | $\Delta_{BZ}$ - 6mer-3oxoG |
|------------|-------------------------|----------------------------|----------------------------|----------------------------|
| BOND       | 1.68                    | 0.166                      | -0.3483                    | 0.0567                     |
| ANGLE      | -3.7698                 | -5.6176                    | -7.7014                    | -13.7595                   |
| DIHED      | 27.1165                 | 19.6848                    | 20.4526                    | 16.3925                    |
| VDWAALS    | -14.1841                | -16.0953                   | -12.0045                   | -10.5475                   |
| <b>EEL</b> | <b>304.8423</b>         | <b>261.4251</b>            | <b>208.9591</b>            | <b>170.4366</b>            |
| 1-4 VDW    | -0.6948                 | -1.2141                    | -1.1204                    | -1.4421                    |
| 1-4 EEL    | 13.6363                 | 30.1998                    | 40.5955                    | 47.3081                    |
| <b>EPB</b> | <b>-324.804</b>         | <b>-293.117</b>            | <b>-253.913</b>            | <b>-221.957</b>            |
| ENPOLAR    | -5.6618                 | -6.0455                    | -4.4046                    | -3.4903                    |
| EDISPER    | 11.5916                 | 13.8362                    | 10.507                     | 10.0718                    |
| G gas      | 328.6265                | 288.5487                   | 248.8327                   | 208.4448                   |
| G solv     | -318.875                | -285.327                   | -247.81                    | -215.376                   |
| TOTAL      | 9.7518                  | 3.2222                     | 1.0225                     | -6.9309                    |

It can be inferred from this table that the major force stabilizing B-DNA is the EEL term (correspond to Electrostatic energy in gas phase) and the one stabilizing Z-DNA is the EPB term (correspond to Polar solvation energy). The substitution of guanine by 8-oxo-guanine decreases the EEL term, indicating a more stabilized Z-DNA in gas phase. The EPB term is also decreased, suggesting a more destabilized Z-DNA by solvation with the substituted 8-oxodG. The driving force by the stabilization in gas phase exceeds the one by the solvation term, resulting in a more stabilized system.

**Table S5** RESP result of central Fragment

|               | pdb atomic name | x        | y        | z        | atom type | charge  |
|---------------|-----------------|----------|----------|----------|-----------|---------|
| 1             | O5'             | 3.100106 | 2.401573 | 0        | OS        | -0.4996 |
| 2             | P               | 3.604511 | 3.980633 | 0.297511 | P         | 1.1507  |
| 3             | OP1             | 3.739753 | 4.703955 | -1.00736 | O2        | -0.7613 |
| 4             | OP2             | 4.664185 | 3.874225 | 1.351052 | O2        | -0.7613 |
| 5             | O3'             | 0        | 0        | 0        | OS        | -0.5841 |
| 6             | C3'             | 1.424912 | 0        | 0        | CT        | 0.3429  |
| 7             | H3'             | 1.821449 | 0.480162 | 0.898223 | H1        | -0.0127 |
| 8             | C4'             | 1.909913 | 0.743601 | -1.25434 | CT        | 0.0976  |
| 9             | H4'             | 1.143761 | 0.632933 | -2.03652 | H1        | 0.0902  |
| 10            | C5'             | 2.171646 | 2.227915 | -1.06105 | CT        | 0.125   |
| 11            | H5'             | 2.557837 | 2.645956 | -2.00347 | H1        | 0.0271  |
| 12            | H5''            | 1.205313 | 2.71096  | -0.84268 | H1        | 0.0271  |
| 13            | O4'             | 3.109982 | 0.084337 | -1.68675 | OS        | -0.3675 |
| 14            | C1'             | 3.361382 | -1.08782 | -0.92354 | CT        | 0.2092  |
| 15            | H1'             | 3.639416 | -1.87599 | -1.62617 | H2        | 0.065   |
| 16            | C2'             | 2.062829 | -1.38843 | -0.16877 | CT        | -0.0863 |
| 17            | H2'             | 1.416449 | -1.98875 | -0.81872 | HC        | 0.0351  |
| 18            | H2''            | 2.219551 | -1.91183 | 0.774788 | HC        | 0.0351  |
| 19            | N2              | 7.90762  | -1.68651 | -3.33346 | N2        | -0.8681 |
| 20            | H21             | 7.162992 | -1.75568 | -4.01648 | H         | 0.3854  |
| 21            | H22             | 8.734237 | -1.22119 | -3.6876  | H         | 0.3854  |
| 22            | O6              | 9.027679 | -0.29065 | 0.962017 | O         | -0.5581 |
| 23            | C6              | 8.111456 | -0.56783 | 0.196    | C         | 0.4907  |
| 24            | C5              | 6.708037 | -0.59431 | 0.415391 | CB        | 0.0598  |
| 25            | N7              | 5.946435 | -0.32581 | 1.547473 | NA        | -0.5864 |
| 26            | H7              | 6.295411 | -0.05617 | 2.454128 | H         | 0.411   |
| 27            | C8              | 4.600535 | -0.50964 | 1.287303 | CK        | 0.5451  |
| 28            | N9              | 4.546634 | -0.91432 | -0.07366 | N*        | -0.05   |
| 29            | C4              | 5.831469 | -0.95358 | -0.58739 | CB        | 0.1714  |
| 30            | N3              | 6.154038 | -1.2982  | -1.85703 | NC        | -0.5669 |
| 31            | C2              | 7.445104 | -1.28675 | -2.09705 | CA        | 0.7254  |
| 32            | N1              | 8.384159 | -0.94625 | -1.15982 | NA        | -0.5114 |
| 33            | H1              | 9.372467 | -1.01618 | -1.37504 | H         | 0.3634  |
| 34            | O8              | 3.674085 | -0.38837 | 2.073324 | O         | -0.5289 |
| RRMS (step 1) |                 | 0.05636  |          |          |           |         |
| RRMS (step 2) |                 | 0.05654  |          |          |           |         |

**Table S6** RESP result of 3' fragment

|               | pdb atomic name | x        | y        | z        | atom type | charge  |
|---------------|-----------------|----------|----------|----------|-----------|---------|
| 1             | P               | -0.74492 | 1.500277 | 0.175031 | P         | 1.1454  |
| 2             | OP1             | -2.21141 | 1.21304  | 0.280378 | O2        | -0.7641 |
| 3             | OP2             | 0.052898 | 2.332857 | 1.131315 | O2        | -0.7641 |
| 4             | O5'             | 0        | 0        | 0        | OS        | -0.4918 |
| 5             | O3'             | 2.188723 | -3.18129 | -1.60948 | OH        | -0.6994 |
| 6             | HO3'            | 1.736427 | -3.80035 | -2.20376 | HO        | 0.4151  |
| 7             | C3'             | 1.183784 | -2.36707 | -0.99496 | CT        | 0.3926  |
| 8             | H3'             | 0.629579 | -1.79566 | -1.74887 | H1        | -0.0288 |
| 9             | C4'             | 1.916835 | -1.43834 | -0.00036 | CT        | 0.0954  |
| 10            | H4'             | 2.986195 | -1.43823 | -0.25135 | H1        | 0.089   |
| 11            | C5'             | 1.419183 | 0        | 0        | CT        | 0.1129  |
| 12            | H5'             | 1.827513 | 0.507266 | 0.887067 | H1        | 0.0301  |
| 13            | H5''            | 1.821842 | 0.503439 | -0.89544 | H1        | 0.0301  |
| 14            | O4'             | 1.741478 | -2.00969 | 1.306041 | OS        | -0.37   |
| 15            | C1'             | 1.114078 | -3.28561 | 1.180645 | CT        | 0.2097  |
| 16            | H1'             | 1.877906 | -4.06255 | 1.065946 | H2        | 0.0647  |
| 17            | C2'             | 0.255006 | -3.17248 | -0.08153 | CT        | -0.0962 |
| 18            | H2'             | -0.01305 | -4.14884 | -0.49969 | HC        | 0.034   |
| 19            | H2''            | -0.64842 | -2.60255 | 0.14013  | HC        | 0.034   |
| 20            | N2              | 3.597527 | -6.46703 | 4.472175 | N2        | -0.8684 |
| 21            | H21             | 4.211193 | -6.27401 | 3.689909 | H         | 0.3856  |
| 22            | H22             | 4.084586 | -6.53834 | 5.356932 | H         | 0.3856  |
| 23            | O6              | -0.2296  | -5.11664 | 6.748282 | O         | -0.5582 |
| 24            | C6              | 0.41035  | -5.02847 | 5.706577 | C         | 0.4917  |
| 25            | C5              | 0.121659 | -4.31988 | 4.50926  | CB        | 0.0587  |
| 26            | N7              | -0.95613 | -3.51638 | 4.151402 | NA        | -0.587  |
| 27            | H7              | -1.75325 | -3.29352 | 4.727103 | H         | 0.4114  |
| 28            | C8              | -0.8065  | -3.03785 | 2.859957 | CK        | 0.5443  |
| 29            | N9              | 0.421217 | -3.60411 | 2.410331 | N*        | -0.0461 |
| 30            | C4              | 0.977534 | -4.36111 | 3.428403 | CB        | 0.1705  |
| 31            | N3              | 2.155946 | -5.0246  | 3.35543  | NC        | -0.5674 |
| 32            | C2              | 2.456055 | -5.69391 | 4.445066 | CA        | 0.7262  |
| 33            | N1              | 1.661418 | -5.71424 | 5.559984 | NA        | -0.512  |
| 34            | H1              | 1.902954 | -6.29996 | 6.351553 | H         | 0.3634  |
| 35            | O8              | -1.56815 | -2.31605 | 2.243278 | O         | -0.529  |
| RRMS (step 1) |                 | 0.05590  |          |          |           |         |
| RRMS (step 2) |                 | 0.05607  |          |          |           |         |

**Table S7** RESP result of 5' fragment

|               | pdb atomic name | x        | y        | z        | atom type | charge  |
|---------------|-----------------|----------|----------|----------|-----------|---------|
| 1             | O3'             | 0        | 0        | 0        | OS        | -0.5767 |
| 2             | O5'             | 4.03565  | 1.102311 | 0        | OH        | -0.5892 |
| 3             | HO5'            | 4.773468 | 1.661176 | 0.283998 | HO        | 0.4034  |
| 4             | C3'             | 1.431954 | 0        | 0        | CT        | 0.3373  |
| 5             | H3'             | 1.822261 | 0.219791 | 1.000696 | H1        | -0.011  |
| 6             | C4'             | 1.872419 | 1.064453 | -1.03057 | CT        | 0.0979  |
| 7             | H4'             | 1.014299 | 1.716657 | -1.2422  | H1        | 0.0902  |
| 8             | C5'             | 3.039673 | 1.930763 | -0.57947 | CT        | 0.1277  |
| 9             | H5'             | 3.422228 | 2.478612 | -1.4538  | H1        | 0.0265  |
| 10            | H5''            | 2.659073 | 2.670173 | 0.145665 | H1        | 0.0265  |
| 11            | O4'             | 2.231246 | 0.357471 | -2.22861 | OS        | -0.3674 |
| 12            | C1'             | 1.892239 | -1.02108 | -2.08023 | CT        | 0.2092  |
| 13            | H1'             | 0.865194 | -1.18734 | -2.42338 | H2        | 0.065   |
| 14            | C2'             | 2.0178   | -1.29141 | -0.57855 | CT        | -0.0853 |
| 15            | H2'             | 1.471305 | -2.18674 | -0.26277 | HC        | 0.0352  |
| 16            | H2''            | 3.071008 | -1.385   | -0.31001 | HC        | 0.0352  |
| 17            | N2              | -0.24706 | -2.4957  | -6.59376 | N2        | -0.868  |
| 18            | H21             | -0.90368 | -1.89535 | -6.10981 | H         | 0.3854  |
| 19            | H22             | -0.24973 | -2.36699 | -7.59802 | H         | 0.3854  |
| 20            | O6              | 4.183427 | -3.89644 | -6.83832 | O         | -0.5581 |
| 21            | C6              | 3.337403 | -3.33627 | -6.15064 | C         | 0.4906  |
| 22            | C5              | 3.429092 | -2.80191 | -4.83722 | CB        | 0.0599  |
| 23            | N7              | 4.488782 | -2.74508 | -3.9377  | NA        | -0.5863 |
| 24            | H7              | 5.421972 | -3.09508 | -4.08982 | H         | 0.4109  |
| 25            | C8              | 4.101647 | -2.12943 | -2.75859 | CK        | 0.5451  |
| 26            | N9              | 2.725102 | -1.81826 | -2.95456 | N*        | -0.0505 |
| 27            | C4              | 2.341146 | -2.21543 | -4.22494 | CB        | 0.1715  |
| 28            | N3              | 1.105565 | -2.05306 | -4.75519 | NC        | -0.5668 |
| 29            | C2              | 0.981987 | -2.53721 | -5.96997 | CA        | 0.7253  |
| 30            | N1              | 2.006562 | -3.14125 | -6.64841 | NA        | -0.5114 |
| 31            | H1              | 1.843713 | -3.55924 | -7.55766 | H         | 0.3634  |
| 32            | O8              | 4.78194  | -1.92502 | -1.77025 | O         | -0.5288 |
| RRMS (step 1) |                 | 0.05643  |          |          |           |         |
| RRMS (step 2) |                 | 0.05662  |          |          |           |         |

**Figure S8** Parm file for 8-oxoGuanine

|              |        |         |    |                |
|--------------|--------|---------|----|----------------|
| MASS         |        |         |    |                |
| BOND         |        |         |    |                |
| CB-NA        | 411.1  | 1.3910  |    |                |
| NA-CK        | 420.5  | 1.3840  |    |                |
| CK-O         | 648.0  | 1.2140  |    |                |
| CK-N*        | 440.0  | 1.4228  |    |                |
|              |        |         |    |                |
| ANGLE        |        |         |    |                |
| C -CB-NA     | 70.0   | 131.00  |    |                |
| CB-NA-H      | 47.630 | 126.350 |    |                |
| CB-NA-CK     | 70.0   | 110.78  |    |                |
| NA-CB-CB     | 70.0   | 107.21  |    |                |
| NA-CK-N*     | 70.0   | 104.52  |    |                |
| NA-CK-O      | 70.0   | 127.6   |    |                |
| H -NA-CK     | 50.0   | 122.87  |    |                |
| N*-CK-O      | 70.0   | 127.83  |    |                |
| CB-N*-CK     | 70.0   | 109.41  |    |                |
| CB-N*-CT     | 70.0   | 124.10  |    |                |
| CK-N*-CT     | 70.0   | 125.83  |    |                |
| C -CB-CB     | 70.0   | 121.30  |    |                |
| CB-CB-N*     | 70.0   | 108.04  |    |                |
| CB-CB-NC     | 70.0   | 126.63  |    |                |
| N*-CB-NC     | 70.0   | 125.33  |    |                |
|              |        |         |    |                |
| DIHE         |        |         |    |                |
| X -CB-NA-X 4 | 6.60   | 180.0   | 2. | same as parm10 |
| x-cb-n*-x    |        |         |    |                |
| X -NA-CK-X 4 | 5.40   | 180.0   | 2. | same as parm10 |
| x-c-na-x     |        |         |    |                |
|              |        |         |    |                |
| IMPROPER     |        |         |    |                |
|              |        |         |    |                |
| NONBON       |        |         |    |                |



**Table S9.** Detailed energy term of 6mer-3G in B and Z form with ion strength of 0 mM NaCl

| 6mer-3G          |          |           |                   |          |           |                   |
|------------------|----------|-----------|-------------------|----------|-----------|-------------------|
| Energy Component | B-DNA    |           |                   | Z-DNA    |           |                   |
|                  | Average  | Std. Dev. | Std. Err. of Mean | Average  | Std. Dev. | Std. Err. of Mean |
| BOND             | 102.7189 | 8.9819    | 0.4017            | 104.3989 | 8.7434    | 0.391             |
| ANGLE            | 205.3394 | 11.0223   | 0.4929            | 201.5696 | 10.9788   | 0.491             |
| DIHED            | 247.5086 | 7.5233    | 0.3365            | 274.6251 | 7.3166    | 0.3272            |
| VDWAALS          | -187.691 | 6.6961    | 0.2995            | -201.875 | 5.2431    | 0.2345            |
| EEL              | 1068.667 | 18.9974   | 0.8496            | 1373.509 | 32.3462   | 1.4466            |
| 1-4 VDW          | 98.0088  | 3.5838    | 0.1603            | 97.314   | 3.6855    | 0.1648            |
| 1-4 EEL          | -2294.56 | 13.1173   | 0.5866            | -2280.93 | 13.7032   | 0.6128            |
| EPB              | -1941.91 | 18.7519   | 0.8386            | -2266.72 | 31.001    | 1.3864            |
| ENPOLAR          | 242.4894 | 2.3348    | 0.1044            | 236.8276 | 1.4371    | 0.0643            |
| EDISPER          | -230.813 | 3.6818    | 0.1647            | -219.222 | 1.7654    | 0.079             |
| G gas            | -760.012 | 24.6513   | 1.1024            | -431.386 | 34.9444   | 1.5628            |
| G solv           | -1930.24 | 19.1451   | 0.8562            | -2249.11 | 30.5337   | 1.3655            |
| TOTAL            | -2690.25 | 14.6804   | 0.6565            | -2680.5  | 14.59     | 0.6525            |

**Table S10.** Detailed energy term of 6mer-1oxoG in B and Z form with ion strength of 0 mM NaCl

| 6mer-1oxoG       |          |           |                   |          |           |                   |
|------------------|----------|-----------|-------------------|----------|-----------|-------------------|
| Energy Component | B-DNA    |           |                   | Z-DNA    |           |                   |
|                  | Average  | Std. Dev. | Std. Err. of Mean | Average  | Std. Dev. | Std. Err. of Mean |
| BOND             | 103.1987 | 8.8418    | 0.3954            | 103.3647 | 8.5812    | 0.3838            |
| ANGLE            | 206.3408 | 11.4703   | 0.513             | 200.7232 | 10.8764   | 0.4864            |
| DIHED            | 252.6016 | 7.0169    | 0.3138            | 272.2864 | 6.856     | 0.3066            |
| VDWAALS          | -187.826 | 5.7635    | 0.2578            | -203.921 | 5.3468    | 0.2391            |
| EEL              | 1264.068 | 17.7462   | 0.7936            | 1525.493 | 31.5765   | 1.4121            |
| 1-4 VDW          | 100.0171 | 3.6924    | 0.1651            | 98.803   | 3.8556    | 0.1724            |
| 1-4 EEL          | -2667.04 | 12.9431   | 0.5788            | -2636.84 | 11.659    | 0.5214            |
| EPB              | -1952.16 | 15.1088   | 0.6757            | -2245.28 | 30.3421   | 1.3569            |
| ENPOLAR          | 244.1011 | 1.4543    | 0.065             | 238.0556 | 1.364     | 0.061             |
| EDISPER          | -235.398 | 1.9381    | 0.0867            | -221.562 | 1.5312    | 0.0685            |
| G gas            | -928.636 | 21.2136   | 0.9487            | -640.087 | 34.0006   | 1.5206            |
| G solv           | -1943.46 | 14.7521   | 0.6597            | -2228.78 | 29.9577   | 1.3397            |
| TOTAL            | -2872.09 | 14.9048   | 0.6666            | -2868.87 | 14.9196   | 0.6672            |

**Table S11.** Detailed energy term of 6mer-2oxoG in B and Z form with ion strength of 0 mM NaCl

| 6mer-2oxoG       |          |           |                   |          |           |                   |
|------------------|----------|-----------|-------------------|----------|-----------|-------------------|
| Energy Component | B-DNA    |           |                   | Z-DNA    |           |                   |
|                  | Average  | Std. Dev. | Std. Err. of Mean | Average  | Std. Dev. | Std. Err. of Mean |
| BOND             | 103.3746 | 9.2147    | 0.4121            | 103.0263 | 9.015     | 0.4032            |
| ANGLE            | 207.5846 | 11.7643   | 0.5261            | 199.8832 | 11.3122   | 0.5059            |
| DIHED            | 248.1983 | 8.1933    | 0.3664            | 268.6509 | 7.712     | 0.3449            |
| VDWAALS          | -191.688 | 6.189     | 0.2768            | -203.692 | 5.8882    | 0.2633            |
| EEL              | 1459.464 | 18.7203   | 0.8372            | 1668.423 | 33.5632   | 1.501             |
| 1-4 VDW          | 100.9821 | 3.8706    | 0.1731            | 99.8617  | 3.8235    | 0.171             |
| 1-4 EEL          | -3039.45 | 12.7868   | 0.5718            | -2998.85 | 12.881    | 0.5761            |
| EPB              | -1953.16 | 15.3302   | 0.6856            | -2207.07 | 33.1197   | 1.4812            |
| ENPOLAR          | 244.0067 | 1.6125    | 0.0721            | 239.6021 | 1.6165    | 0.0723            |
| EDISPER          | -234.824 | 2.2432    | 0.1003            | -224.317 | 2.0307    | 0.0908            |
| G gas            | -1111.53 | 21.2854   | 0.9519            | -862.698 | 35.7952   | 1.6008            |
| G solv           | -1943.98 | 15.2084   | 0.6801            | -2191.79 | 32.6104   | 1.4584            |
| TOTAL            | -3055.51 | 14.7278   | 0.6586            | -3054.49 | 14.584    | 0.6522            |

**Table S12.** Detailed energy term of 6mer-3oxoG in B and Z form with ion strength of 0 mM NaCl

| 6mer-3oxoG       |          |           |                   |          |           |                   |
|------------------|----------|-----------|-------------------|----------|-----------|-------------------|
| Energy Component | B-DNA    |           |                   | Z-DNA    |           |                   |
|                  | Average  | Std. Dev. | Std. Err. of Mean | Average  | Std. Dev. | Std. Err. of Mean |
| BOND             | 102.0986 | 8.7241    | 0.3902            | 102.1553 | 8.6441    | 0.3866            |
| ANGLE            | 211.0459 | 11.4594   | 0.5125            | 197.2864 | 11.5553   | 0.5168            |
| DIHED            | 250.4703 | 7.3237    | 0.3275            | 266.8628 | 7.4162    | 0.3317            |
| VDWAALS          | -194.789 | 6.3598    | 0.2844            | -205.337 | 5.3817    | 0.2407            |
| EEL              | 1580.975 | 19.6165   | 0.8773            | 1751.412 | 32.9767   | 1.4748            |
| 1-4 VDW          | 101.5511 | 3.995     | 0.1787            | 100.109  | 3.5375    | 0.1582            |
| 1-4 EEL          | -3297.05 | 14.2683   | 0.6381            | -3249.74 | 12.7946   | 0.5722            |
| EPB              | -1958.87 | 16.308    | 0.7293            | -2180.83 | 30.1276   | 1.3473            |
| ENPOLAR          | 244.3656 | 1.6205    | 0.0725            | 240.8753 | 1.4976    | 0.067             |
| EDISPER          | -236.321 | 2.0281    | 0.0907            | -226.25  | 1.8423    | 0.0824            |
| G gas            | -1245.7  | 20.9007   | 0.9347            | -1037.25 | 34.1625   | 1.5278            |
| G solv           | -1950.82 | 15.9647   | 0.714             | -2166.2  | 29.7223   | 1.3292            |
| TOTAL            | -3196.52 | 13.8036   | 0.6173            | -3203.45 | 14.5675   | 0.6515            |

**Table S13.** Detailed energy term of 6mer-3G in B and Z form with ion strength of 5 mM NaCl

| 6mer-3G          |          |           |                   |          |           |                   |
|------------------|----------|-----------|-------------------|----------|-----------|-------------------|
| Energy Component | B-DNA    |           |                   | Z-DNA    |           |                   |
|                  | Average  | Std. Dev. | Std. Err. of Mean | Average  | Std. Dev. | Std. Err. of Mean |
| BOND             | 102.7189 | 8.9819    | 0.4017            | 104.3989 | 8.7434    | 0.391             |
| ANGLE            | 205.3394 | 11.0223   | 0.4929            | 201.5696 | 10.9788   | 0.491             |
| DIHED            | 247.5086 | 7.5233    | 0.3365            | 274.6251 | 7.3166    | 0.3272            |
| VDWAALS          | -187.691 | 6.6961    | 0.2995            | -201.875 | 5.2431    | 0.2345            |
| EEL              | 1068.667 | 18.9974   | 0.8496            | 1373.509 | 32.3462   | 1.4466            |
| 1-4 VDW          | 98.0088  | 3.5838    | 0.1603            | 97.314   | 3.6855    | 0.1648            |
| 1-4 EEL          | -2294.56 | 13.1173   | 0.5866            | -2280.93 | 13.7032   | 0.6128            |
| EPB              | -1941.68 | 18.7714   | 0.8395            | -2267.12 | 31.0046   | 1.3866            |
| ENPOLAR          | 242.4894 | 2.3348    | 0.1044            | 236.8276 | 1.4371    | 0.0643            |
| EDISPER          | -230.813 | 3.6818    | 0.1647            | -219.222 | 1.7654    | 0.079             |
| G gas            | -760.012 | 24.6513   | 1.1024            | -431.386 | 34.9444   | 1.5628            |
| G solv           | -1930    | 19.1686   | 0.8572            | -2249.52 | 30.5392   | 1.3658            |
| TOTAL            | -2690.01 | 14.6756   | 0.6563            | -2680.9  | 14.571    | 0.6516            |

**Table S14.** Detailed energy term of 6mer-1oxoG in B and Z form with ion strength of 5 mM NaCl

| 6mer-1oxoG       |          |           |                   |          |           |                   |
|------------------|----------|-----------|-------------------|----------|-----------|-------------------|
| Energy Component | B-DNA    |           |                   | Z-DNA    |           |                   |
|                  | Average  | Std. Dev. | Std. Err. of Mean | Average  | Std. Dev. | Std. Err. of Mean |
| BOND             | 103.1987 | 8.8418    | 0.3954            | 103.3647 | 8.5812    | 0.3838            |
| ANGLE            | 206.3408 | 11.4703   | 0.513             | 200.7232 | 10.8764   | 0.4864            |
| DIHED            | 252.6016 | 7.0169    | 0.3138            | 272.2864 | 6.856     | 0.3066            |
| VDWAALS          | -187.826 | 5.7635    | 0.2578            | -203.921 | 5.3468    | 0.2391            |
| EEL              | 1264.068 | 17.7462   | 0.7936            | 1525.493 | 31.5765   | 1.4121            |
| 1-4 VDW          | 100.0171 | 3.6924    | 0.1651            | 98.803   | 3.8556    | 0.1724            |
| 1-4 EEL          | -2667.04 | 12.9431   | 0.5788            | -2636.84 | 11.659    | 0.5214            |
| EPB              | -1951.96 | 15.1121   | 0.6758            | -2245.37 | 30.3472   | 1.3572            |
| ENPOLAR          | 244.1011 | 1.4543    | 0.065             | 238.0556 | 1.364     | 0.061             |
| EDISPER          | -235.398 | 1.9381    | 0.0867            | -221.562 | 1.5312    | 0.0685            |
| G gas            | -928.636 | 21.2136   | 0.9487            | -640.087 | 34.0006   | 1.5206            |
| G solv           | -1943.26 | 14.7563   | 0.6599            | -2228.88 | 29.962    | 1.3399            |
| TOTAL            | -2871.89 | 14.9093   | 0.6668            | -2868.96 | 14.9151   | 0.667             |

**Table S15.** Detailed energy term of 6mer-2oxoG in B and Z form with ion strength of 5 mM NaCl

| 6mer-2oxoG       |          |           |                   |          |           |                   |
|------------------|----------|-----------|-------------------|----------|-----------|-------------------|
| Energy Component | B-DNA    |           |                   | Z-DNA    |           |                   |
|                  | Average  | Std. Dev. | Std. Err. of Mean | Average  | Std. Dev. | Std. Err. of Mean |
| BOND             | 103.3746 | 9.2147    | 0.4121            | 103.0263 | 9.015     | 0.4032            |
| ANGLE            | 207.5846 | 11.7643   | 0.5261            | 199.8832 | 11.3122   | 0.5059            |
| DIHED            | 248.1983 | 8.1933    | 0.3664            | 268.6509 | 7.712     | 0.3449            |
| VDWAALS          | -191.688 | 6.189     | 0.2768            | -203.692 | 5.8882    | 0.2633            |
| EEL              | 1459.464 | 18.7203   | 0.8372            | 1668.423 | 33.5632   | 1.501             |
| 1-4 VDW          | 100.9821 | 3.8706    | 0.1731            | 99.8617  | 3.8235    | 0.171             |
| 1-4 EEL          | -3039.45 | 12.7868   | 0.5718            | -2998.85 | 12.881    | 0.5761            |
| EPB              | -1953.08 | 15.3433   | 0.6862            | -2207.33 | 33.1286   | 1.4816            |
| ENPOLAR          | 244.0067 | 1.6125    | 0.0721            | 239.6021 | 1.6165    | 0.0723            |
| EDISPER          | -234.824 | 2.2432    | 0.1003            | -224.317 | 2.0307    | 0.0908            |
| G gas            | -1111.53 | 21.2854   | 0.9519            | -862.698 | 35.7952   | 1.6008            |
| G solv           | -1943.9  | 15.2236   | 0.6808            | -2192.04 | 32.6187   | 1.4588            |
| TOTAL            | -3055.43 | 14.7254   | 0.6585            | -3054.74 | 14.5869   | 0.6523            |

**Table S16.** Detailed energy term of 6mer-3oxoG in B and Z form with ion strength of 5 mM NaCl

| 6mer-3oxoG       |          |           |                   |          |           |                   |
|------------------|----------|-----------|-------------------|----------|-----------|-------------------|
| Energy Component | B-DNA    |           |                   | Z-DNA    |           |                   |
|                  | Average  | Std. Dev. | Std. Err. of Mean | Average  | Std. Dev. | Std. Err. of Mean |
| BOND             | 102.0986 | 8.7241    | 0.3902            | 102.1553 | 8.6441    | 0.3866            |
| ANGLE            | 211.0459 | 11.4594   | 0.5125            | 197.2864 | 11.5553   | 0.5168            |
| DIHED            | 250.4703 | 7.3237    | 0.3275            | 266.8628 | 7.4162    | 0.3317            |
| VDWAALS          | -194.789 | 6.3598    | 0.2844            | -205.337 | 5.3817    | 0.2407            |
| EEL              | 1580.975 | 19.6165   | 0.8773            | 1751.412 | 32.9767   | 1.4748            |
| 1-4 VDW          | 101.5511 | 3.995     | 0.1787            | 100.109  | 3.5375    | 0.1582            |
| 1-4 EEL          | -3297.05 | 14.2683   | 0.6381            | -3249.74 | 12.7946   | 0.5722            |
| EPB              | -1958.8  | 16.3076   | 0.7293            | -2180.91 | 30.1114   | 1.3466            |
| ENPOLAR          | 244.3656 | 1.6205    | 0.0725            | 240.8753 | 1.4976    | 0.067             |
| EDISPER          | -236.321 | 2.0281    | 0.0907            | -226.25  | 1.8423    | 0.0824            |
| G gas            | -1245.7  | 20.9007   | 0.9347            | -1037.25 | 34.1625   | 1.5278            |
| G solv           | -1950.76 | 15.9665   | 0.714             | -2166.28 | 29.7038   | 1.3284            |
| TOTAL            | -3196.46 | 13.8044   | 0.6174            | -3203.54 | 14.5488   | 0.6506            |

**Table S17.** Detailed energy term of 6mer-3G in B and Z form with ion strength of 20 mM NaCl

| 6mer-3G          |          |           |                   |          |           |                   |
|------------------|----------|-----------|-------------------|----------|-----------|-------------------|
| Energy Component | B-DNA    |           |                   | Z-DNA    |           |                   |
|                  | Average  | Std. Dev. | Std. Err. of Mean | Average  | Std. Dev. | Std. Err. of Mean |
| BOND             | 102.7189 | 8.9819    | 0.4017            | 104.3989 | 8.7434    | 0.391             |
| ANGLE            | 205.3394 | 11.0223   | 0.4929            | 201.5696 | 10.9788   | 0.491             |
| DIHED            | 247.5086 | 7.5233    | 0.3365            | 274.6251 | 7.3166    | 0.3272            |
| VDWAALS          | -187.691 | 6.6961    | 0.2995            | -201.875 | 5.2431    | 0.2345            |
| EEL              | 1068.667 | 18.9974   | 0.8496            | 1373.509 | 32.3462   | 1.4466            |
| 1-4 VDW          | 98.0088  | 3.5838    | 0.1603            | 97.314   | 3.6855    | 0.1648            |
| 1-4 EEL          | -2294.56 | 13.1173   | 0.5866            | -2280.93 | 13.7032   | 0.6128            |
| EPB              | -1941.46 | 18.7975   | 0.8407            | -2267.39 | 30.9995   | 1.3863            |
| ENPOLAR          | 242.4894 | 2.3348    | 0.1044            | 236.8276 | 1.4371    | 0.0643            |
| EDISPER          | -230.813 | 3.6818    | 0.1647            | -219.222 | 1.7654    | 0.079             |
| G gas            | -760.012 | 24.6513   | 1.1024            | -431.386 | 34.9444   | 1.5628            |
| G solv           | -1929.78 | 19.186    | 0.858             | -2249.78 | 30.5355   | 1.3656            |
| TOTAL            | -2689.79 | 14.6512   | 0.6552            | -2681.17 | 14.568    | 0.6515            |

**Table S18.** Detailed energy term of 6mer-1oxoG in B and Z form with 20 mM NaCl

| 6mer-1oxoG       |          |           |                   |          |           |                   |
|------------------|----------|-----------|-------------------|----------|-----------|-------------------|
| Energy Component | B-DNA    |           |                   | Z-DNA    |           |                   |
|                  | Average  | Std. Dev. | Std. Err. of Mean | Average  | Std. Dev. | Std. Err. of Mean |
| BOND             | 103.1987 | 8.8418    | 0.3954            | 103.3647 | 8.5812    | 0.3838            |
| ANGLE            | 206.3408 | 11.4703   | 0.513             | 200.7232 | 10.8764   | 0.4864            |
| DIHED            | 252.6016 | 7.0169    | 0.3138            | 272.2864 | 6.856     | 0.3066            |
| VDWAALS          | -187.826 | 5.7635    | 0.2578            | -203.921 | 5.3468    | 0.2391            |
| EEL              | 1264.068 | 17.7462   | 0.7936            | 1525.493 | 31.5765   | 1.4121            |
| 1-4 VDW          | 100.0171 | 3.6924    | 0.1651            | 98.803   | 3.8556    | 0.1724            |
| 1-4 EEL          | -2667.04 | 12.9431   | 0.5788            | -2636.84 | 11.659    | 0.5214            |
| EPB              | -1951.7  | 15.2061   | 0.68              | -2245.81 | 30.3597   | 1.3577            |
| ENPOLAR          | 244.1011 | 1.4543    | 0.065             | 238.0556 | 1.364     | 0.061             |
| EDISPER          | -235.398 | 1.9381    | 0.0867            | -221.562 | 1.5312    | 0.0685            |
| G gas            | -928.636 | 21.2136   | 0.9487            | -640.087 | 34.0006   | 1.5206            |
| G solv           | -1943    | 14.8451   | 0.6639            | -2229.32 | 29.9741   | 1.3405            |
| TOTAL            | -2871.63 | 14.8954   | 0.6661            | -2869.41 | 14.9148   | 0.667             |

**Table S19.** Detailed energy term of 6mer-2oxoG in B and Z form with 20 mM NaCl

| 6mer-2oxoG       |          |           |                   |          |           |                   |
|------------------|----------|-----------|-------------------|----------|-----------|-------------------|
| Energy Component | B-DNA    |           |                   | Z-DNA    |           |                   |
|                  | Average  | Std. Dev. | Std. Err. of Mean | Average  | Std. Dev. | Std. Err. of Mean |
| BOND             | 103.3746 | 9.2147    | 0.4121            | 103.0263 | 9.015     | 0.4032            |
| ANGLE            | 207.5846 | 11.7643   | 0.5261            | 199.8832 | 11.3122   | 0.5059            |
| DIHED            | 248.1983 | 8.1933    | 0.3664            | 268.6509 | 7.712     | 0.3449            |
| VDWAALS          | -191.688 | 6.189     | 0.2768            | -203.692 | 5.8882    | 0.2633            |
| EEL              | 1459.464 | 18.7203   | 0.8372            | 1668.423 | 33.5632   | 1.501             |
| 1-4 VDW          | 100.9821 | 3.8706    | 0.1731            | 99.8617  | 3.8235    | 0.171             |
| 1-4 EEL          | -3039.45 | 12.7868   | 0.5718            | -2998.85 | 12.881    | 0.5761            |
| EPB              | -1952.74 | 15.3404   | 0.686             | -2207.77 | 33.113    | 1.4809            |
| ENPOLAR          | 244.0067 | 1.6125    | 0.0721            | 239.6021 | 1.6165    | 0.0723            |
| EDISPER          | -234.824 | 2.2432    | 0.1003            | -224.317 | 2.0307    | 0.0908            |
| G gas            | -1111.53 | 21.2854   | 0.9519            | -862.698 | 35.7952   | 1.6008            |
| G solv           | -1943.56 | 15.2185   | 0.6806            | -2192.48 | 32.6043   | 1.4581            |
| TOTAL            | -3055.09 | 14.7118   | 0.6579            | -3055.18 | 14.5768   | 0.6519            |

**Table S20.** Detailed energy term of 6mer-3oxoG in B and Z form with 20 mM NaCl

| 6mer-3oxoG       |          |           |                   |          |           |                   |
|------------------|----------|-----------|-------------------|----------|-----------|-------------------|
| Energy Component | B-DNA    |           |                   | Z-DNA    |           |                   |
|                  | Average  | Std. Dev. | Std. Err. of Mean | Average  | Std. Dev. | Std. Err. of Mean |
| BOND             | 102.0986 | 8.7241    | 0.3902            | 102.1553 | 8.6441    | 0.3866            |
| ANGLE            | 211.0459 | 11.4594   | 0.5125            | 197.2864 | 11.5553   | 0.5168            |
| DIHED            | 250.4703 | 7.3237    | 0.3275            | 266.8628 | 7.4162    | 0.3317            |
| VDWAALS          | -194.789 | 6.3598    | 0.2844            | -205.337 | 5.3817    | 0.2407            |
| EEL              | 1580.975 | 19.6165   | 0.8773            | 1751.412 | 32.9767   | 1.4748            |
| 1-4 VDW          | 101.5511 | 3.995     | 0.1787            | 100.109  | 3.5375    | 0.1582            |
| 1-4 EEL          | -3297.05 | 14.2683   | 0.6381            | -3249.74 | 12.7946   | 0.5722            |
| EPB              | -1958.45 | 16.3112   | 0.7295            | -2181.29 | 30.1051   | 1.3463            |
| ENPOLAR          | 244.3656 | 1.6205    | 0.0725            | 240.8753 | 1.4976    | 0.067             |
| EDISPER          | -236.321 | 2.0281    | 0.0907            | -226.25  | 1.8423    | 0.0824            |
| G gas            | -1245.7  | 20.9007   | 0.9347            | -1037.25 | 34.1625   | 1.5278            |
| G solv           | -1950.41 | 15.9711   | 0.7142            | -2166.67 | 29.6965   | 1.3281            |
| TOTAL            | -3196.11 | 13.7813   | 0.6163            | -3203.92 | 14.5516   | 0.6508            |

**Table S21.** Detailed energy term of 6mer-3G in B and Z form with 50 mM NaCl

| 6mer-3G          |          |           |                   |          |           |                   |
|------------------|----------|-----------|-------------------|----------|-----------|-------------------|
| Energy Component | B-DNA    |           |                   | Z-DNA    |           |                   |
|                  | Average  | Std. Dev. | Std. Err. of Mean | Average  | Std. Dev. | Std. Err. of Mean |
| BOND             | 102.7189 | 8.9819    | 0.4017            | 104.3989 | 8.7434    | 0.391             |
| ANGLE            | 205.3394 | 11.0223   | 0.4929            | 201.5696 | 10.9788   | 0.491             |
| DIHED            | 247.5086 | 7.5233    | 0.3365            | 274.6251 | 7.3166    | 0.3272            |
| VDWAALS          | -187.691 | 6.6961    | 0.2995            | -201.875 | 5.2431    | 0.2345            |
| EEL              | 1068.667 | 18.9974   | 0.8496            | 1373.509 | 32.3462   | 1.4466            |
| 1-4 VDW          | 98.0088  | 3.5838    | 0.1603            | 97.314   | 3.6855    | 0.1648            |
| 1-4 EEL          | -2294.56 | 13.1173   | 0.5866            | -2280.93 | 13.7032   | 0.6128            |
| EPB              | -1942    | 18.7358   | 0.8379            | -2267.42 | 31.0253   | 1.3875            |
| ENPOLAR          | 242.4894 | 2.3348    | 0.1044            | 236.8276 | 1.4371    | 0.0643            |
| EDISPER          | -230.813 | 3.6818    | 0.1647            | -219.222 | 1.7654    | 0.079             |
| G gas            | -760.012 | 24.6513   | 1.1024            | -431.386 | 34.9444   | 1.5628            |
| G solv           | -1930.33 | 19.1071   | 0.8545            | -2249.82 | 30.5623   | 1.3668            |
| TOTAL            | -2690.34 | 14.6912   | 0.657             | -2681.2  | 14.5746   | 0.6518            |

**Table S22.** Detailed energy term of 6mer-1oxoG in B and Z form with 50 mM NaCl

| 6mer-1oxoG       |          |           |                   |          |           |                   |
|------------------|----------|-----------|-------------------|----------|-----------|-------------------|
| Energy Component | B-DNA    |           |                   | Z-DNA    |           |                   |
|                  | Average  | Std. Dev. | Std. Err. of Mean | Average  | Std. Dev. | Std. Err. of Mean |
| BOND             | 103.1987 | 8.8418    | 0.3954            | 103.3647 | 8.5812    | 0.3838            |
| ANGLE            | 206.3408 | 11.4703   | 0.513             | 200.7232 | 10.8764   | 0.4864            |
| DIHED            | 252.6016 | 7.0169    | 0.3138            | 272.2864 | 6.856     | 0.3066            |
| VDWAALS          | -187.826 | 5.7635    | 0.2578            | -203.921 | 5.3468    | 0.2391            |
| EEL              | 1264.068 | 17.7462   | 0.7936            | 1525.493 | 31.5765   | 1.4121            |
| 1-4 VDW          | 100.0171 | 3.6924    | 0.1651            | 98.803   | 3.8556    | 0.1724            |
| 1-4 EEL          | -2667.04 | 12.9431   | 0.5788            | -2636.84 | 11.659    | 0.5214            |
| EPB              | -1952.18 | 15.3281   | 0.6855            | -2246.29 | 30.3366   | 1.3567            |
| ENPOLAR          | 244.1011 | 1.4543    | 0.065             | 238.0556 | 1.364     | 0.061             |
| EDISPER          | -235.398 | 1.9381    | 0.0867            | -221.562 | 1.5312    | 0.0685            |
| G gas            | -928.636 | 21.2136   | 0.9487            | -640.087 | 34.0006   | 1.5206            |
| G solv           | -1943.48 | 14.9623   | 0.6691            | -2229.8  | 29.9528   | 1.3395            |
| TOTAL            | -2872.12 | 14.9158   | 0.6671            | -2869.89 | 14.912    | 0.6669            |

**Table S23.** Detailed energy term of 6mer-2oxoG in B and Z form with 50 mM NaCl

| 6mer-2oxoG       |          |           |                   |          |           |                   |
|------------------|----------|-----------|-------------------|----------|-----------|-------------------|
| Energy Component | B-DNA    |           |                   | Z-DNA    |           |                   |
|                  | Average  | Std. Dev. | Std. Err. of Mean | Average  | Std. Dev. | Std. Err. of Mean |
| BOND             | 103.3746 | 9.2147    | 0.4121            | 103.0263 | 9.015     | 0.4032            |
| ANGLE            | 207.5846 | 11.7643   | 0.5261            | 199.8832 | 11.3122   | 0.5059            |
| DIHED            | 248.1983 | 8.1933    | 0.3664            | 268.6509 | 7.712     | 0.3449            |
| VDWAALS          | -191.688 | 6.189     | 0.2768            | -203.692 | 5.8882    | 0.2633            |
| EEL              | 1459.464 | 18.7203   | 0.8372            | 1668.423 | 33.5632   | 1.501             |
| 1-4 VDW          | 100.9821 | 3.8706    | 0.1731            | 99.8617  | 3.8235    | 0.171             |
| 1-4 EEL          | -3039.45 | 12.7868   | 0.5718            | -2998.85 | 12.881    | 0.5761            |
| EPB              | -1952.68 | 15.362    | 0.687             | -2207.93 | 33.09     | 1.4798            |
| ENPOLAR          | 244.0067 | 1.6125    | 0.0721            | 239.6021 | 1.6165    | 0.0723            |
| EDISPER          | -234.824 | 2.2432    | 0.1003            | -224.317 | 2.0307    | 0.0908            |
| G gas            | -1111.53 | 21.2854   | 0.9519            | -862.698 | 35.7952   | 1.6008            |
| G solv           | -1943.5  | 15.2333   | 0.6813            | -2192.64 | 32.583    | 1.4572            |
| TOTAL            | -3055.03 | 14.7212   | 0.6584            | -3055.34 | 14.551    | 0.6507            |

**Table S24.** Detailed energy term of 6mer-3oxoG in B and Z form with 50 mM NaCl

| 6mer-3oxoG       |          |           |                   |          |           |                   |
|------------------|----------|-----------|-------------------|----------|-----------|-------------------|
| Energy Component | B-DNA    |           |                   | Z-DNA    |           |                   |
|                  | Average  | Std. Dev. | Std. Err. of Mean | Average  | Std. Dev. | Std. Err. of Mean |
| BOND             | 102.0986 | 8.7241    | 0.3902            | 102.1553 | 8.6441    | 0.3866            |
| ANGLE            | 211.0459 | 11.4594   | 0.5125            | 197.2864 | 11.5553   | 0.5168            |
| DIHED            | 250.4703 | 7.3237    | 0.3275            | 266.8628 | 7.4162    | 0.3317            |
| VDWAALS          | -194.789 | 6.3598    | 0.2844            | -205.337 | 5.3817    | 0.2407            |
| EEL              | 1580.975 | 19.6165   | 0.8773            | 1751.412 | 32.9767   | 1.4748            |
| 1-4 VDW          | 101.5511 | 3.995     | 0.1787            | 100.109  | 3.5375    | 0.1582            |
| 1-4 EEL          | -3297.05 | 14.2683   | 0.6381            | -3249.74 | 12.7946   | 0.5722            |
| EPB              | -1958.21 | 16.3316   | 0.7304            | -2181.77 | 30.1201   | 1.347             |
| ENPOLAR          | 244.3656 | 1.6205    | 0.0725            | 240.8753 | 1.4976    | 0.067             |
| EDISPER          | -236.321 | 2.0281    | 0.0907            | -226.25  | 1.8423    | 0.0824            |
| G gas            | -1245.7  | 20.9007   | 0.9347            | -1037.25 | 34.1625   | 1.5278            |
| G solv           | -1950.16 | 15.9844   | 0.7148            | -2167.15 | 29.7134   | 1.3288            |
| TOTAL            | -3195.86 | 13.8044   | 0.6174            | -3204.4  | 14.5691   | 0.6516            |



**Table S25.** Detailed energy term of 6mer-3G in B and Z form with 1.0 M NaCl

| 6mer-3G          |          |           |                   |          |           |                   |
|------------------|----------|-----------|-------------------|----------|-----------|-------------------|
| Energy Component | B-DNA    |           |                   | Z-DNA    |           |                   |
|                  | Average  | Std. Dev. | Std. Err. of Mean | Average  | Std. Dev. | Std. Err. of Mean |
| BOND             | 102.7189 | 8.9819    | 0.4017            | 104.3989 | 8.7434    | 0.391             |
| ANGLE            | 205.3394 | 11.0223   | 0.4929            | 201.5696 | 10.9788   | 0.491             |
| DIHED            | 247.5086 | 7.5233    | 0.3365            | 274.6251 | 7.3166    | 0.3272            |
| VDWAALS          | -187.691 | 6.6961    | 0.2995            | -201.875 | 5.2431    | 0.2345            |
| EEL              | 1068.667 | 18.9974   | 0.8496            | 1373.509 | 32.3462   | 1.4466            |
| 1-4 VDW          | 98.0088  | 3.5838    | 0.1603            | 97.314   | 3.6855    | 0.1648            |
| 1-4 EEL          | -2294.56 | 13.1173   | 0.5866            | -2280.93 | 13.7032   | 0.6128            |
| EPB              | -1942.14 | 18.8033   | 0.8409            | -2268.06 | 31.0752   | 1.3897            |
| ENPOLAR          | 242.4894 | 2.3348    | 0.1044            | 236.8276 | 1.4371    | 0.0643            |
| EDISPER          | -230.813 | 3.6818    | 0.1647            | -219.222 | 1.7654    | 0.079             |
| G gas            | -760.012 | 24.6513   | 1.1024            | -431.386 | 34.9444   | 1.5628            |
| G solv           | -1930.46 | 19.1869   | 0.8581            | -2250.45 | 30.6136   | 1.3691            |
| TOTAL            | -2690.47 | 14.6789   | 0.6565            | -2681.84 | 14.576    | 0.6519            |

**Table S26.** Detailed energy term of 6mer-1oxoG in B and Z form with 1.0 M NaCl

| 6mer-1oxoG       |          |           |                   |          |           |                   |
|------------------|----------|-----------|-------------------|----------|-----------|-------------------|
| Energy Component | B-DNA    |           |                   | Z-DNA    |           |                   |
|                  | Average  | Std. Dev. | Std. Err. of Mean | Average  | Std. Dev. | Std. Err. of Mean |
| BOND             | 103.1987 | 8.8418    | 0.3954            | 103.3647 | 8.5812    | 0.3838            |
| ANGLE            | 206.3408 | 11.4703   | 0.513             | 200.7232 | 10.8764   | 0.4864            |
| DIHED            | 252.6016 | 7.0169    | 0.3138            | 272.2864 | 6.856     | 0.3066            |
| VDWAALS          | -187.826 | 5.7635    | 0.2578            | -203.921 | 5.3468    | 0.2391            |
| EEL              | 1264.068 | 17.7462   | 0.7936            | 1525.493 | 31.5765   | 1.4121            |
| 1-4 VDW          | 100.0171 | 3.6924    | 0.1651            | 98.803   | 3.8556    | 0.1724            |
| 1-4 EEL          | -2667.04 | 12.9431   | 0.5788            | -2636.84 | 11.659    | 0.5214            |
| EPB              | -1952.44 | 15.2305   | 0.6811            | -2246.93 | 30.4058   | 1.3598            |
| ENPOLAR          | 244.1011 | 1.4543    | 0.065             | 238.0556 | 1.364     | 0.061             |
| EDISPER          | -235.398 | 1.9381    | 0.0867            | -221.562 | 1.5312    | 0.0685            |
| G gas            | -928.636 | 21.2136   | 0.9487            | -640.087 | 34.0006   | 1.5206            |
| G solv           | -1943.74 | 14.8681   | 0.6649            | -2230.44 | 30.024    | 1.3427            |
| TOTAL            | -2872.37 | 14.8895   | 0.6659            | -2870.53 | 14.9347   | 0.6679            |

**Table S27.** Detailed energy term of 6mer-2oxoG in B and Z form with 1.0 M NaCl

| 6mer-2oxoG       |          |           |                   |          |           |                   |
|------------------|----------|-----------|-------------------|----------|-----------|-------------------|
| Energy Component | B-DNA    |           |                   | Z-DNA    |           |                   |
|                  | Average  | Std. Dev. | Std. Err. of Mean | Average  | Std. Dev. | Std. Err. of Mean |
| BOND             | 103.3746 | 9.2147    | 0.4121            | 103.0263 | 9.015     | 0.4032            |
| ANGLE            | 207.5846 | 11.7643   | 0.5261            | 199.8832 | 11.3122   | 0.5059            |
| DIHED            | 248.1983 | 8.1933    | 0.3664            | 268.6509 | 7.712     | 0.3449            |
| VDWAALS          | -191.688 | 6.189     | 0.2768            | -203.692 | 5.8882    | 0.2633            |
| EEL              | 1459.464 | 18.7203   | 0.8372            | 1668.423 | 33.5632   | 1.501             |
| 1-4 VDW          | 100.9821 | 3.8706    | 0.1731            | 99.8617  | 3.8235    | 0.171             |
| 1-4 EEL          | -3039.45 | 12.7868   | 0.5718            | -2998.85 | 12.881    | 0.5761            |
| EPB              | -1953.21 | 15.4026   | 0.6888            | -2208.49 | 33.2169   | 1.4855            |
| ENPOLAR          | 244.0067 | 1.6125    | 0.0721            | 239.6021 | 1.6165    | 0.0723            |
| EDISPER          | -234.824 | 2.2432    | 0.1003            | -224.317 | 2.0307    | 0.0908            |
| G gas            | -1111.53 | 21.2854   | 0.9519            | -862.698 | 35.7952   | 1.6008            |
| G solv           | -1944.02 | 15.2753   | 0.6831            | -2193.21 | 32.7107   | 1.4629            |
| TOTAL            | -3055.55 | 14.7267   | 0.6586            | -3055.9  | 14.5474   | 0.6506            |

**Table S28.** Detailed energy term of 6mer-3oxoG in B and Z form with 1.0 M NaCl

| 6mer-3oxoG       |          |           |                   |          |           |                   |
|------------------|----------|-----------|-------------------|----------|-----------|-------------------|
| Energy Component | B-DNA    |           |                   | Z-DNA    |           |                   |
|                  | Average  | Std. Dev. | Std. Err. of Mean | Average  | Std. Dev. | Std. Err. of Mean |
| BOND             | 102.0986 | 8.7241    | 0.3902            | 102.1553 | 8.6441    | 0.3866            |
| ANGLE            | 211.0459 | 11.4594   | 0.5125            | 197.2864 | 11.5553   | 0.5168            |
| DIHED            | 250.4703 | 7.3237    | 0.3275            | 266.8628 | 7.4162    | 0.3317            |
| VDWAALS          | -194.789 | 6.3598    | 0.2844            | -205.337 | 5.3817    | 0.2407            |
| EEL              | 1580.975 | 19.6165   | 0.8773            | 1751.412 | 32.9767   | 1.4748            |
| 1-4 VDW          | 101.5511 | 3.995     | 0.1787            | 100.109  | 3.5375    | 0.1582            |
| 1-4 EEL          | -3297.05 | 14.2683   | 0.6381            | -3249.74 | 12.7946   | 0.5722            |
| EPB              | -1958.97 | 16.4134   | 0.734             | -2182.42 | 30.2714   | 1.3538            |
| ENPOLAR          | 244.3656 | 1.6205    | 0.0725            | 240.8753 | 1.4976    | 0.067             |
| EDISPER          | -236.321 | 2.0281    | 0.0907            | -226.25  | 1.8423    | 0.0824            |
| G gas            | -1245.7  | 20.9007   | 0.9347            | -1037.25 | 34.1625   | 1.5278            |
| G solv           | -1950.93 | 16.0658   | 0.7185            | -2167.79 | 29.8684   | 1.3358            |
| TOTAL            | -3196.63 | 13.8255   | 0.6183            | -3205.04 | 14.5731   | 0.6517            |

**Table S29.** Detailed energy term of 6mer-3G in B and Z form with 2.0 M NaCl

| 6mer-3G          |          |           |                   |          |           |                   |
|------------------|----------|-----------|-------------------|----------|-----------|-------------------|
| Energy Component | B-DNA    |           |                   | Z-DNA    |           |                   |
|                  | Average  | Std. Dev. | Std. Err. of Mean | Average  | Std. Dev. | Std. Err. of Mean |
| BOND             | 102.7189 | 8.9819    | 0.4017            | 104.3989 | 8.7434    | 0.391             |
| ANGLE            | 205.3394 | 11.0223   | 0.4929            | 201.5696 | 10.9788   | 0.491             |
| DIHED            | 247.5086 | 7.5233    | 0.3365            | 274.6251 | 7.3166    | 0.3272            |
| VDWAALS          | -187.691 | 6.6961    | 0.2995            | -201.875 | 5.2431    | 0.2345            |
| EEL              | 1068.667 | 18.9974   | 0.8496            | 1373.509 | 32.3462   | 1.4466            |
| 1-4 VDW          | 98.0088  | 3.5838    | 0.1603            | 97.314   | 3.6855    | 0.1648            |
| 1-4 EEL          | -2294.56 | 13.1173   | 0.5866            | -2280.93 | 13.7032   | 0.6128            |
| EPB              | -1941.83 | 18.8398   | 0.8425            | -2268.44 | 31.1355   | 1.3924            |
| ENPOLAR          | 242.4894 | 2.3348    | 0.1044            | 236.8276 | 1.4371    | 0.0643            |
| EDISPER          | -230.813 | 3.6818    | 0.1647            | -219.222 | 1.7654    | 0.079             |
| G gas            | -760.012 | 24.6513   | 1.1024            | -431.386 | 34.9444   | 1.5628            |
| G solv           | -1930.15 | 19.2137   | 0.8593            | -2250.84 | 30.6737   | 1.3718            |
| TOTAL            | -2690.16 | 14.6607   | 0.6556            | -2682.22 | 14.5723   | 0.6517            |

**Table S30.** Detailed energy term of 6mer-1oxoG in B and Z form with 2.0 M NaCl

| 6mer-1oxoG       |          |           |                   |          |           |                   |
|------------------|----------|-----------|-------------------|----------|-----------|-------------------|
| Energy Component | B-DNA    |           |                   | Z-DNA    |           |                   |
|                  | Average  | Std. Dev. | Std. Err. of Mean | Average  | Std. Dev. | Std. Err. of Mean |
| BOND             | 103.1987 | 8.8418    | 0.3954            | 103.3647 | 8.5812    | 0.3838            |
| ANGLE            | 206.3408 | 11.4703   | 0.513             | 200.7232 | 10.8764   | 0.4864            |
| DIHED            | 252.6016 | 7.0169    | 0.3138            | 272.2864 | 6.856     | 0.3066            |
| VDWAALS          | -187.826 | 5.7635    | 0.2578            | -203.921 | 5.3468    | 0.2391            |
| EEL              | 1264.068 | 17.7462   | 0.7936            | 1525.493 | 31.5765   | 1.4121            |
| 1-4 VDW          | 100.0171 | 3.6924    | 0.1651            | 98.803   | 3.8556    | 0.1724            |
| 1-4 EEL          | -2667.04 | 12.9431   | 0.5788            | -2636.84 | 11.659    | 0.5214            |
| EPB              | -1952.16 | 15.2961   | 0.6841            | -2247.33 | 30.4685   | 1.3626            |
| ENPOLAR          | 244.1011 | 1.4543    | 0.065             | 238.0556 | 1.364     | 0.061             |
| EDISPER          | -235.398 | 1.9381    | 0.0867            | -221.562 | 1.5312    | 0.0685            |
| G gas            | -928.636 | 21.2136   | 0.9487            | -640.087 | 34.0006   | 1.5206            |
| G solv           | -1943.46 | 14.9236   | 0.6674            | -2230.84 | 30.0861   | 1.3455            |
| TOTAL            | -2872.1  | 14.888    | 0.6658            | -2870.92 | 14.9139   | 0.667             |

**Table S31.** Detailed energy term of 6mer-2oxoG in B and Z form with 2.0 M NaCl

| 6mer-2oxoG       |          |           |                   |          |           |                   |
|------------------|----------|-----------|-------------------|----------|-----------|-------------------|
| Energy Component | B-DNA    |           |                   | Z-DNA    |           |                   |
|                  | Average  | Std. Dev. | Std. Err. of Mean | Average  | Std. Dev. | Std. Err. of Mean |
| BOND             | 103.3746 | 9.2147    | 0.4121            | 103.0263 | 9.015     | 0.4032            |
| ANGLE            | 207.5846 | 11.7643   | 0.5261            | 199.8832 | 11.3122   | 0.5059            |
| DIHED            | 248.1983 | 8.1933    | 0.3664            | 268.6509 | 7.712     | 0.3449            |
| VDWAALS          | -191.688 | 6.189     | 0.2768            | -203.692 | 5.8882    | 0.2633            |
| EEL              | 1459.464 | 18.7203   | 0.8372            | 1668.423 | 33.5632   | 1.501             |
| 1-4 VDW          | 100.9821 | 3.8706    | 0.1731            | 99.8617  | 3.8235    | 0.171             |
| 1-4 EEL          | -3039.45 | 12.7868   | 0.5718            | -2998.85 | 12.881    | 0.5761            |
| EPB              | -1953.05 | 15.4263   | 0.6899            | -2208.71 | 33.2469   | 1.4868            |
| ENPOLAR          | 244.0067 | 1.6125    | 0.0721            | 239.6021 | 1.6165    | 0.0723            |
| EDISPER          | -234.824 | 2.2432    | 0.1003            | -224.317 | 2.0307    | 0.0908            |
| G gas            | -1111.53 | 21.2854   | 0.9519            | -862.698 | 35.7952   | 1.6008            |
| G solv           | -1943.87 | 15.2913   | 0.6838            | -2193.42 | 32.7408   | 1.4642            |
| TOTAL            | -3055.4  | 14.7385   | 0.6591            | -3056.12 | 14.5484   | 0.6506            |

**Table S32.** Detailed energy term of 6mer-3oxoG in B and Z form with 2.0 M NaCl

| 6mer-3oxoG       |          |           |                   |          |           |                   |
|------------------|----------|-----------|-------------------|----------|-----------|-------------------|
| Energy Component | B-DNA    |           |                   | Z-DNA    |           |                   |
|                  | Average  | Std. Dev. | Std. Err. of Mean | Average  | Std. Dev. | Std. Err. of Mean |
| BOND             | 102.0986 | 8.7241    | 0.3902            | 102.1553 | 8.6441    | 0.3866            |
| ANGLE            | 211.0459 | 11.4594   | 0.5125            | 197.2864 | 11.5553   | 0.5168            |
| DIHED            | 250.4703 | 7.3237    | 0.3275            | 266.8628 | 7.4162    | 0.3317            |
| VDWAALS          | -194.789 | 6.3598    | 0.2844            | -205.337 | 5.3817    | 0.2407            |
| EEL              | 1580.975 | 19.6165   | 0.8773            | 1751.412 | 32.9767   | 1.4748            |
| 1-4 VDW          | 101.5511 | 3.995     | 0.1787            | 100.109  | 3.5375    | 0.1582            |
| 1-4 EEL          | -3297.05 | 14.2683   | 0.6381            | -3249.74 | 12.7946   | 0.5722            |
| EPB              | -1958.75 | 16.4813   | 0.7371            | -2182.53 | 30.2937   | 1.3548            |
| ENPOLAR          | 244.3656 | 1.6205    | 0.0725            | 240.8753 | 1.4976    | 0.067             |
| EDISPER          | -236.321 | 2.0281    | 0.0907            | -226.25  | 1.8423    | 0.0824            |
| G gas            | -1245.7  | 20.9007   | 0.9347            | -1037.25 | 34.1625   | 1.5278            |
| G solv           | -1950.71 | 16.1291   | 0.7213            | -2167.9  | 29.8898   | 1.3367            |
| TOTAL            | -3196.41 | 13.8242   | 0.6182            | -3205.15 | 14.5487   | 0.6506            |
